# Supplementary material for: Effects of Environmental Clutter on Synthesized Chiropteran Echolocation Signals in an Anechoic Chamber
Source: MDPI journal article supplement (doi:10.3390/acoustics3020026), 2021-06-11
Supplement: s1 [file s1]

# Supplementary Materials: Effects of Environmental Clutter on Synthesized Chiropteran Echolocation Signals in an Anechoic Chamber

Samuel R. Freeze, Masoud Shirazi, Nicole Abaid, Mark Ford, Alexander Silvis and Dawn Hakkenberg

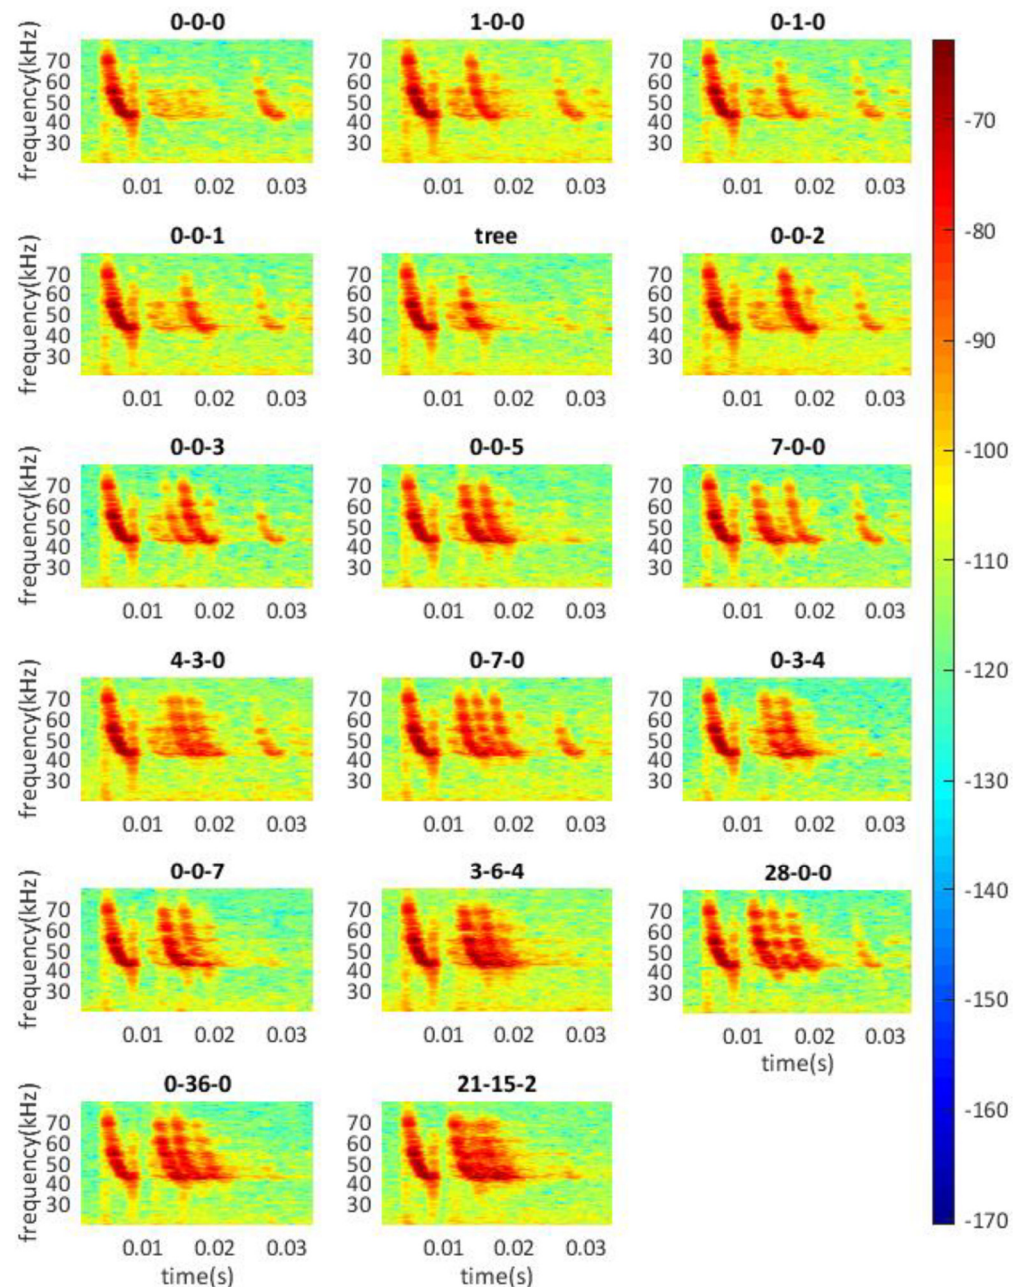

**Figure S1.** Spectrograms of the signal recorded by microphone A (angle 0°) for each experimental condition (subfigures a-q, see Table 1 for details).

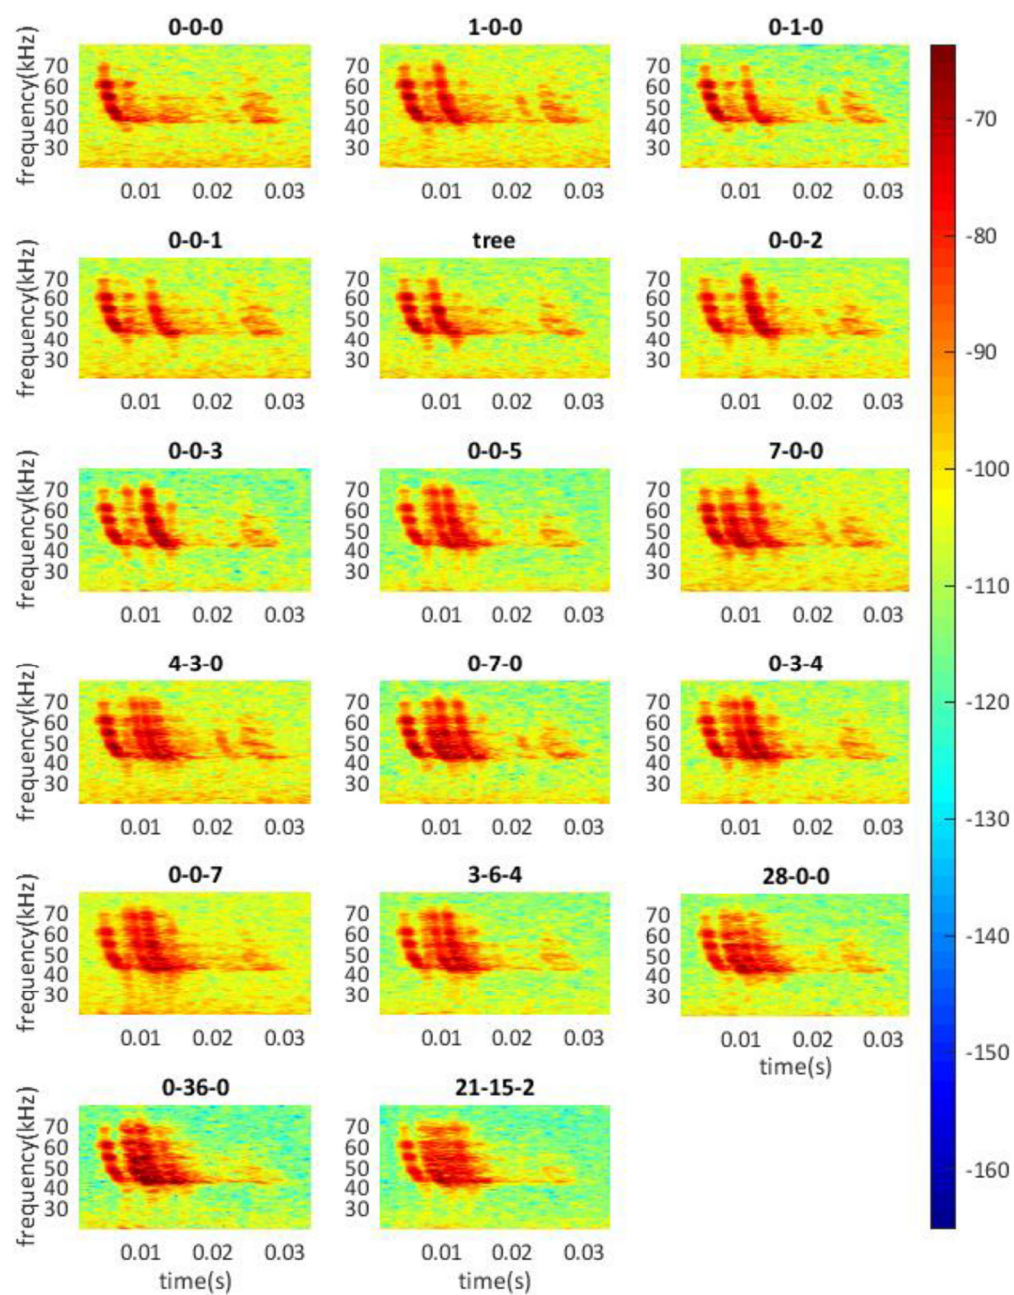

**Figure S2.** Spectrograms of the signal recorded by microphone B (angle 45°) for each experimental condition (subfigures a-q, see Table 1 for details).



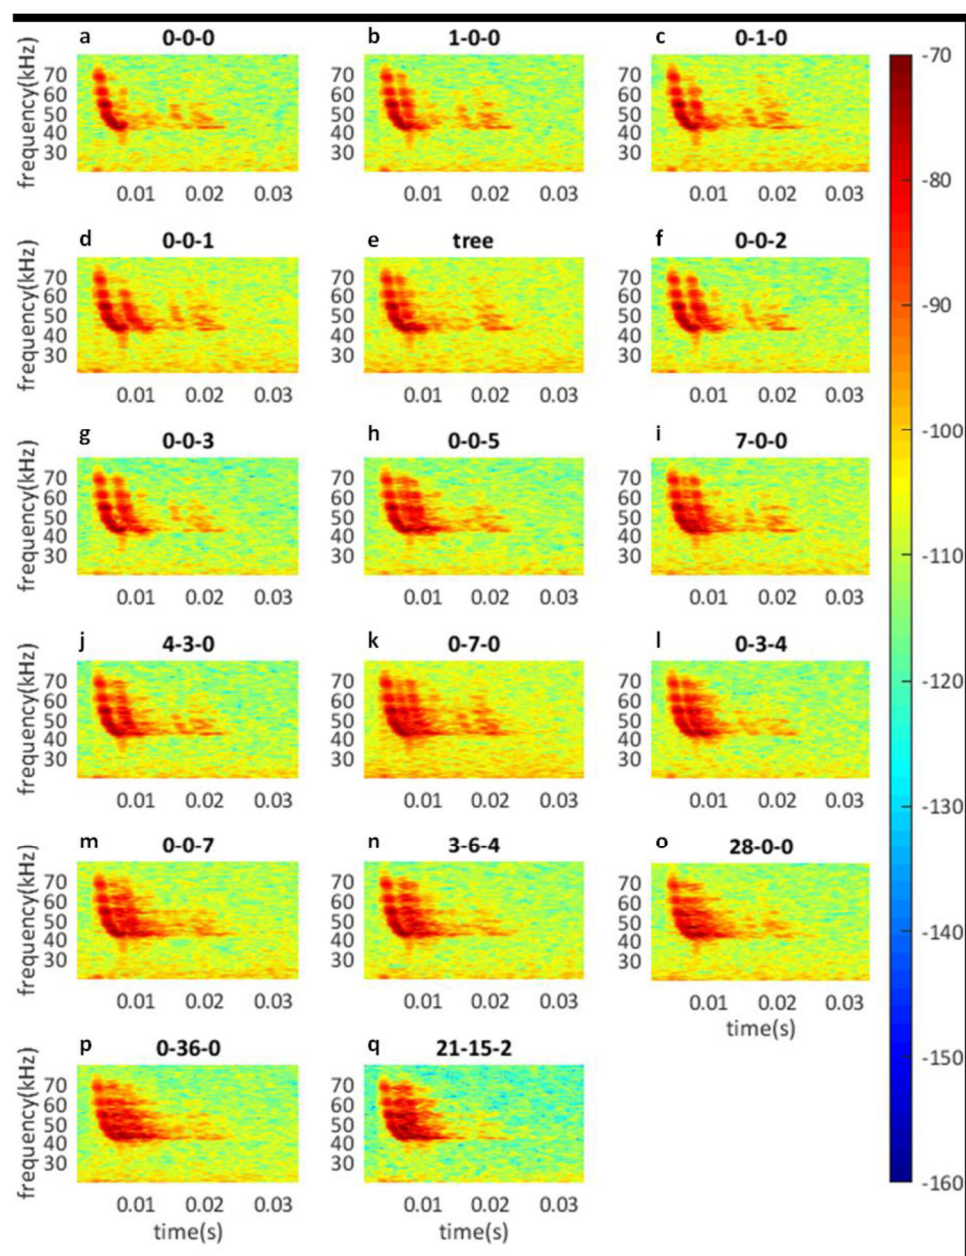

**Figure S3.** Spectrograms of the signal recorded by microphone C (angle 90°) for each experimental condition (subfigures a-q, see Table 1 for details).

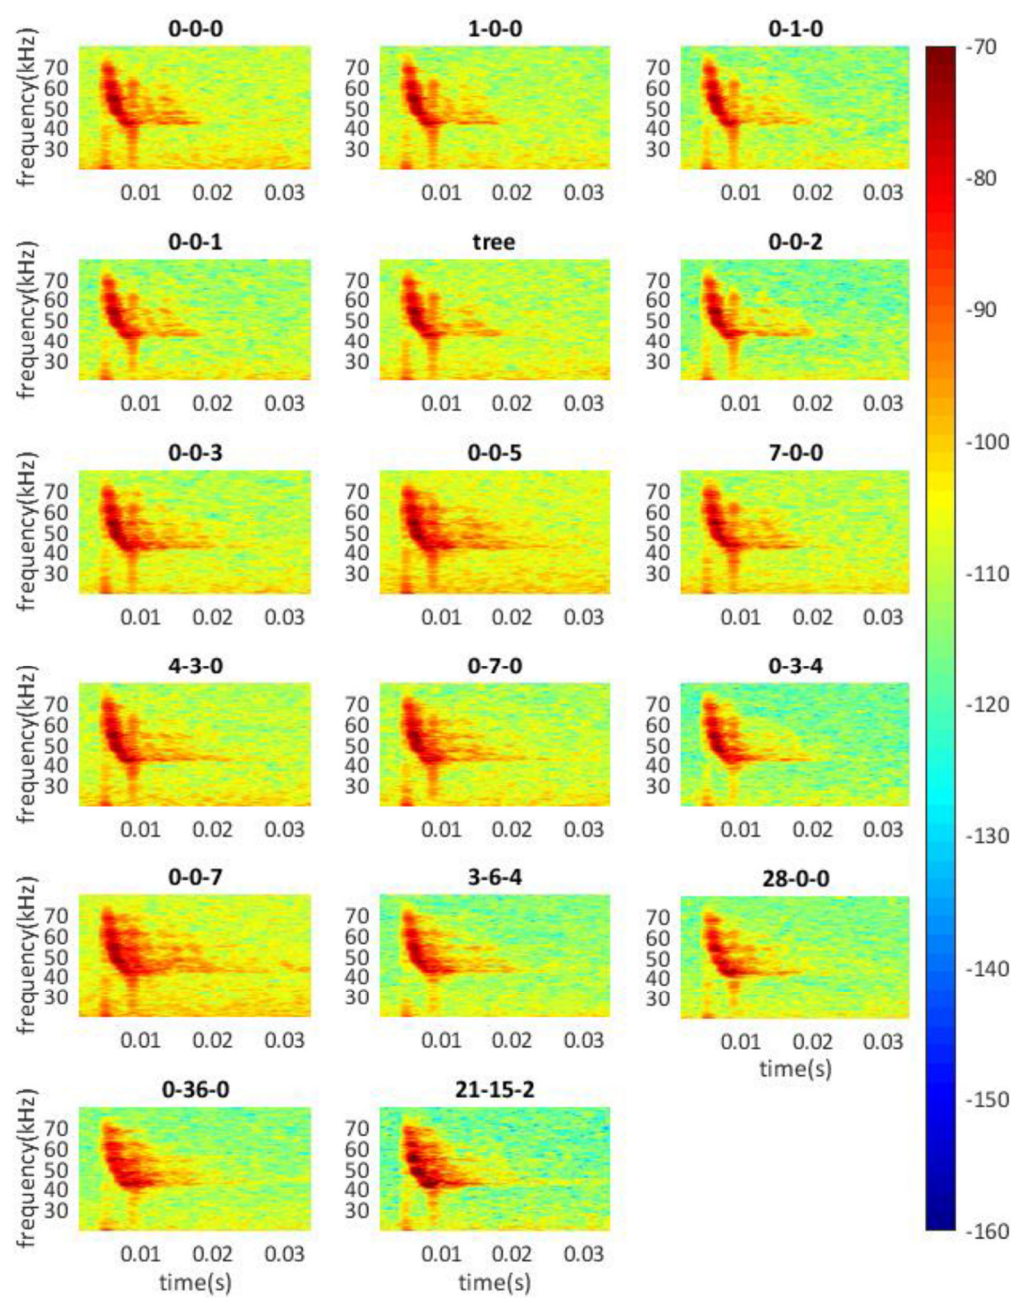

**Figure S4.** Spectrograms of the signal recorded by microphone D (angle 135°) for each experimental condition (subfigures a-q, see Table 1 for details)/.



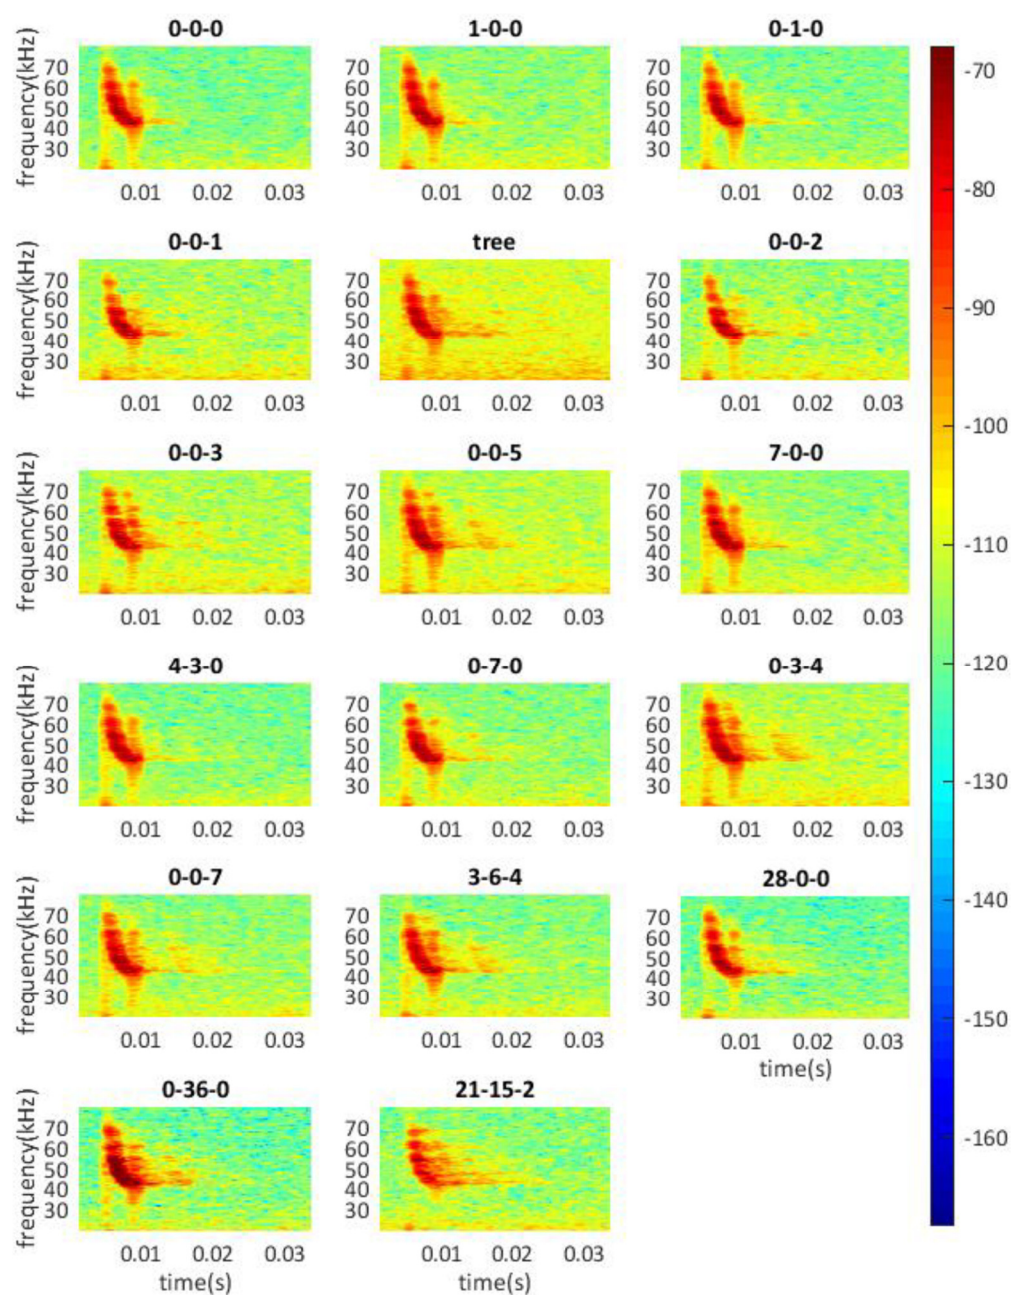

**Figure S5.** Spectrograms of the signal recorded by microphone E (angle 180°) for each experimental condition (subfigures a-q, see Table 1 for details).
